# Supplementary material for: Taste Preference-Related Genetic Polymorphisms Modify Alcohol Consumption Behavior of the Hungarian General and Roma Populations
Source: MDPI journal article supplement (doi:10.3390/genes14030666), 2023-03-07
Supplement: s1 [file s1]

**Table S1.** Demographic characteristics of the two study samples.

| Characteristic*                          | Variable                  | Hungarian general | Hungarian Roma | p-value** |
|------------------------------------------|---------------------------|-------------------|----------------|-----------|
| Marital status<br>n (%)                  | married                   | 253 (61.71%)      | 256 (66.15%)   | 0.240     |
|                                          | single                    | 95 (23.17%)       | 71 (18.35%)    |           |
|                                          | widow, divorced           | 60 (14.63%)       | 55 (14.21%)    |           |
| Educational level<br>n (%)               | primary education or less | 86 (20.98%)       | 327 (84.50%)   | <0.001    |
|                                          | secondary education       | 109 (26.59%)      | 42 (10.85%)    |           |
|                                          | high school               | 138 (33.66%)      | 12 (3.10%)     |           |
|                                          | tertiary education        | 75 (18.29%)       | 1 (0.26%)      |           |
| Self-perceived financial status<br>n (%) | good                      | 127 (30.98%)      | 58 (14.99%)    | <0.001    |
|                                          | satisfactory              | 227 (55.37%)      | 207 (53.49%)   |           |
|                                          | bad                       | 48 (11.71%)       | 117 (30.23%)   |           |
| Economic activity<br>n (%)               | worker                    | 303 (73.90%)      | 228 (58.91%)   | <0.001    |
|                                          | inactive***               | 69 (16.83%)       | 69 (17.83%)    |           |
|                                          | unemployed                | 32 (7.80%)        | 83 (21.45%)    |           |

\*Unequal to 100% due to missing cases. \*\*Pearson chi-square and Fisher's exact test. Bold indicates statistical significance. \*\*\*Inactive: pensioner, other allowance, student.

**Table S2.** Drinking categories of the Hungarian general and Roma populations according to the 1<sup>st</sup> three questions of the AUDIT questionnaire

| Drinking frequency prevalence<br>(AUDIT question 1)                              | never        | monthly or less   | 2-4 times a month     | 2-3 times a week or more | p-value* |
|----------------------------------------------------------------------------------|--------------|-------------------|-----------------------|--------------------------|----------|
| HG n (%)                                                                         | 191 (46.81%) | 116 (28.43%)      | 49 (12.01%)           | 52 (12.75%)              | <0.001   |
| HR n (%)                                                                         | 202 (52.60%) | 145 (37.76%)      | 16 (4.17%)            | 21 (5.47%)               |          |
| Prevalence of number of drinks consumed<br>(AUDIT question 2)                    | 1 or 2       | 3 or 4            | 5 or more             |                          |          |
| HG n (%)                                                                         | 341 (83.58%) | 48 (11.76%)       | 19 (4.66%)            |                          | 0.378    |
| HR n (%)                                                                         | 303 (79.74%) | 55 (14.47%)       | 22 (5.79%)            |                          |          |
| The prevalence of consuming 6 or more alcohol per occasion<br>(AUDIT question 3) | never        | less than monthly | monthly or more often |                          |          |
| HG n(%)                                                                          | 332 (80.98%) | 57 (13.90%)       | 21 (5.12%)            |                          | 0.400    |
| HR n (%)                                                                         | 321 (84.03%) | 41 (10.73%)       | 20 (5.24%)            |                          |          |

HG: Hungarian general population; HR: Hungarian Roma population. \*Pearson chi-square and Fisher's exact test. Bold indicates statistical significance.

**Table S3.** Hardy-Weinberg equilibrium test for selected genetic polymorphisms

| Gene           | SNP        | Position       | Consequence                  | European allele frequencies* | European genotype frequencies*      | HG (p-value of HWE) | HR (p-value of HWE) |
|----------------|------------|----------------|------------------------------|------------------------------|-------------------------------------|---------------------|---------------------|
| <i>TAS1R3</i>  | rs307355   | chr1:1329774   | 2KB Upstream Variant         | T: 0.079<br>C: 0.921         | TT: 0.012<br>CC: 0.855<br>CT: 0.133 | 0.978               | 0.996               |
| <i>TAS2R38</i> | rs713598   | chr7:141973545 | Missense Variant (Ala49Pro)  | C: 0.578<br>G: 0.422         | CC: 0.338<br>CG: 0.479<br>GG: 0.183 | 0.021               | 0.362               |
| <i>TAS2R19</i> | rs10772420 | chr12:11021677 | Missense Variant (Arg299Cys) | G: 0.495<br>A: 0.505         | AA: 0.272<br>AG: 0.465<br>GG: 0.262 | 0.892               | 0.667               |
| <i>CA6</i>     | rs2274333  | chr1:8957145   | Missense Variant (Ser90Gly)  | A=0.709<br>G=0.291           | AA: 0.525<br>AG: 0.368<br>GG: 0.107 | 0.052               | 0.949               |

HG: Hungarian general population; HR: Hungarian Roma population; SNP: single nucleotide polymorphism; HWE: Hardy-Weinberg equilibrium; Hardy-Weinberg equilibrium (HWE) was estimated using the “hwsnp” function in STATA [1]. Significance threshold for Hardy-Weinberg equilibrium was 0.001. *TAS1R3*: Taste receptor type 1 member 3; *TAS2R38*: Taste 2 receptor member 38; *TAS2R19*: Taste receptor type 2 member 19; *CA6*: Carbonic anhydrase VI. \*dbSNP

**Table S4.** Allele frequencies of selected genetic polymorphisms in the Hungarian general and Roma populations

| Gene           | SNP        | Allele | HG allele count (n) | HG allele frequency | HR allele count (n) | HG allele frequency | p-value |
|----------------|------------|--------|---------------------|---------------------|---------------------|---------------------|---------|
| <i>TAS1R3</i>  | rs307355   | C      | 730                 | 0.90                | 662                 | 0.91                | 0.588   |
|                |            | T      | 80                  | 0.10                | 66                  | 0.09                |         |
| <i>TAS2R38</i> | rs713598   | C      | 446                 | 0.56                | 433                 | 0.60                | 0.107   |
|                |            | G      | 352                 | 0.44                | 289                 | 0.40                |         |
| <i>TAS2R19</i> | rs10772420 | G      | 453                 | 0.56                | 435                 | 0.60                | 0.087   |
|                |            | A      | 357                 | 0.44                | 287                 | 0.40                |         |
| <i>CA6</i>     | rs2274333  | A      | 553                 | 0.69                | 513                 | 0.71                | 0.418   |
|                |            | G      | 249                 | 0.31                | 211                 | 0.29                |         |

HG: Hungarian general population; HR: Hungarian Roma population; SNP: single nucleotide polymorphism; *TAS1R3*: Taste receptor type 1 member 3; *TAS2R38*: Taste 2 receptor member 38; *TAS2R19*: Taste receptor type 2 member 19; *CA6*: Carbonic anhydrase VI; Allele frequencies were estimated by “genhw” program in STATA [2]. To test the differences in the allele frequencies between the two populations the  $\chi^2$  test was applied.

**Table S5.** Association analysis of selected genetic polymorphisms with alcohol consumption phenotypes in the Hungarian general and Roma populations

| Phenotype<br>(AUDIT<br>question) | Gene, SNP             | HG                                    | HR                                    | HG                                    | HR                                 |
|----------------------------------|-----------------------|---------------------------------------|---------------------------------------|---------------------------------------|------------------------------------|
|                                  |                       | Dominant<br>genetic model p-<br>value | Dominant<br>genetic model p-<br>value | Recessive<br>genetic model<br>p-value | Recessive genetic<br>model p-value |
| AUDIT1                           | TAS1R3<br>rs307355    | 0.500                                 | 0.289                                 | 0.381                                 | 0.416                              |
|                                  | TAS2R38<br>rs713598   | 0.872                                 | 0.205                                 | 0.359                                 | 0.075                              |
|                                  | TAS2R19<br>rs10772420 | 0.277                                 | 0.862                                 | 0.260                                 | 0.408                              |
|                                  | CA6<br>rs2274333      | 0.443                                 | 0.195                                 | 0.861                                 | 0.354                              |
| AUDIT2                           | TAS1R3<br>rs307355    | 0.808                                 | 0.544                                 | 0.637                                 | 0.353                              |
|                                  | TAS2R38<br>rs713598   | 0.402                                 | 0.812                                 | <b>0.028</b>                          | 0.255                              |
|                                  | TAS2R19<br>rs10772420 | 0.557                                 | 0.525                                 | 0.482                                 | 0.684                              |
|                                  | CA6<br>rs2274333      | 0.787                                 | 0.494                                 | 0.243                                 | 0.264                              |
| AUDIT3                           | TAS1R3<br>rs307355    | 0.517                                 | 0.204                                 | 0.543                                 | 0.876                              |
|                                  | TAS2R38<br>rs713598   | 0.523                                 | 0.499                                 | 0.994                                 | <b>0.048</b>                       |
|                                  | TAS2R19<br>rs10772420 | 0.246                                 | 0.693                                 | 0.108                                 | 0.770                              |
|                                  | CA6<br>rs2274333      | 0.482                                 | 0.072                                 | 0.550                                 | 0.363                              |

HG: Hungarian general population; HR: Hungarian Roma population; SNP: single nucleotide polymorphism; TAS1R3: Taste receptor type 1 member 3; TAS2R38: Taste 2 receptor member 38; TAS2R19: Taste receptor type 2 member 19; CA6: Carbonic anhydrase VI; AUDIT: Alcohol Use Disorders Identification Test; AUDIT1: How often do you have a drink containing alcohol? (0p: never; 1p: monthly or less; 2p: 2 to 4 times a month; 3p: 2 to 3 times a week; 4p: 4 or more times a week); AUDIT2: How many standard drinks containing alcohol do you have on a typical day when drinking? (0p: 1 or 2; 1p: 3 or 4; 2p: 5 or 6; 3p: 7 to 9; 4p: 10 or more); AUDIT3: How often do you have six or more drinks on one occasion? (0p: Never; 1p: Less than monthly; 2p: Monthly; 3p: Weekly; 4p: Daily or almost daily); Association analyses were conducted by using STATA's "qtlstnp" command [1]. Models were defined according to minor alleles. Covariates: gender, age, marital status; Nominally significant p values are presented in bold.

#### References:

1. Cleves, M., Exploratory analysis of single nucleotide polymorphisms (SNP) for quantitative traits. *The Stata Journal* **2005**, 5, (2), 141–153.
2. Cleves, M. A., Hardy-Weinberg equilibrium tests and allele frequency estimation. *STATA Technical Bulletin*. **1999**, 48, 34-37.
